# Supplementary material for: Efficient tribological properties of azomethine-functionalized chitosan as a bio-lubricant additive in paraffin oil: experimental and theoretical analysis
Source: Royal Society of Chemistry journal article supplement (doi:10.1039/d0ra07011d), 2020-01-01
Supplement: d0ra07011d1.pdf [file d0ra07011d1.pdf]

## Efficient tribological properties of azomethine functionalized chitosan as bio-lubricant additive in paraffin oil: Experimental and theoretical analysis

Manilal Murmu<sup>a,b</sup>, Sirsendu Sengupta<sup>a,b,†</sup>, Ritam Pal<sup>c,‡</sup>, Sukdeb Mandal<sup>a,b</sup>, Naresh Chandra Murmu<sup>a,b</sup> and Priyabrata Banerjee<sup>\*a,b</sup>

<sup>a</sup>Surface Engineering and Tribology Division, Central Mechanical Engineering Research Institute, M.G. Avenue, City Centre, Durgapur 713209, West Bengal, India.

<sup>b</sup>Academy of Scientific and Innovative Research, CSIR- Human Resource Development Centre, (CSIR-HRDC) Campus, Postal Staff College Area, Sector 19, Kamla Nehru Nagar, Ghaziabad 201 002, Uttar Pradesh, India.

<sup>c</sup>Department of Mechanical Engineering, Jadavpur University, Jadavpur, Kolkata 700032, West Bengal, India.

\*Corresponding Author: P. Banerjee, e-Mail: pr\_banerjee@cmeri.res.in; Website: <https://www.cmeri.res.in> & <http://www.priyabratbanerjee.in>

‡These authors contributed equally to the work.

A. According to Koopman's theorem, the ionization energy ( $I$ ) and electron affinity ( $A$ ) are associated with  $E_{HOMO}$  and  $E_{LUMO}$ , respectively. The magnitude of  $I$  and  $A$  is the negative of  $E_{HOMO}$  and  $E_{LUMO}$ , respectively. <sup>S1</sup>

$$I = -E_{HOMO} \quad (S1)$$

$$I = -E_{HOMO} \quad (S2)$$

$$\chi = \frac{I + A}{2}$$

(S3)

$$\eta = \frac{I - A}{2}$$

(S4)

### B. COMPASS forcefield

The functional form of COMPASS force field is written as:<sup>S2-S5</sup>

$$E = E_{bond} + E_{angle} + E_{oop} + E_{torsion} + E_{cross} + E_{elec} + E_{lj} \quad (S5)$$

Where  $E_{bond}$ ,  $E_{angle}$ ,  $E_{oop}$ ,  $E_{torsion}$ ,  $E_{cross}$ ,  $E_{elec}$  and  $E_{lj}$  are the energy contributions of bond stretching, angle bending, out of plane angle coordinates, torsion, cross coupling, electrostatic and van der Waals interactions. The terms used in equation (5) can be expanded as follows:

$$E_{bond} = \sum_b [k_2(b - b_0)^2 + k_3(b - b_0)^3 + k_4(b - b_0)^4] \quad (S6)$$

$$E_{angle} = \sum_\theta [H_2(\theta - \theta_0)^2 + H_3(\theta - \theta_0)^3 + H_4(\theta - \theta_0)^4] \quad (S7)$$

$$E_{torsion} = \sum_\phi [V_1[1 - \cos(\phi - \phi_0)^2] + V_2[1 - \cos(2\phi - \phi_0)^2] + V_3[1 - \cos(3\phi - \phi_0)^2]] \quad (S8)$$

$$E_{oop} = \sum_\chi k_\chi \chi^2 \quad (S9)$$

$$\begin{aligned}
E_{cross} = & \sum_b \sum_{b'} F_{bb'} (b-b_0)(b'-b'_0) + \sum_{\theta} \sum_{\theta'} F_{\theta\theta'} (\theta-\theta_0)(\theta'-\theta'_0) + \sum_b \sum_{\theta} F_{b\theta} (b-b_0)(\theta-\theta_0) \\
& + \sum_b \sum_{\phi} F_{b\phi} (b-b_0) [V_1 \cos \phi + V_2 \cos 2\phi + V_3 \cos 3\phi] + \sum_{b'} \sum_{\phi} F_{b'\phi} (b'-b'_0) [V_1 \cos \phi + V_2 \cos 2\phi + V_3 \cos 3\phi] \\
& + \sum_{\theta} \sum_{\phi} F_{\theta\phi} (\theta-\theta_0) [V_1 \cos \phi + V_2 \cos 2\phi + V_3 \cos 3\phi] + \sum_{\theta} \sum_{\theta'} \sum_{\phi} k_{\phi\theta\theta'} \cos \phi (\theta-\theta_0)(\theta'-\theta'_0)
\end{aligned} \tag{S10}$$

$$E_{elec} = \sum_{i,j} \frac{q_i q_j}{\epsilon r_{ij}} \tag{S11}$$

$$E_{lj} = \sum_{i,j} \epsilon_{ij} \left[ 2 \left( \frac{r_{ij}^0}{r_{ij}} \right)^9 - 3 \left( \frac{r_{ij}^0}{r_{ij}} \right)^6 \right] \tag{S12}$$

where  $b, \theta, \phi$ , and  $\chi$  signifies the bond length, valence angle, torsion angle and out of plane angle, respectively.

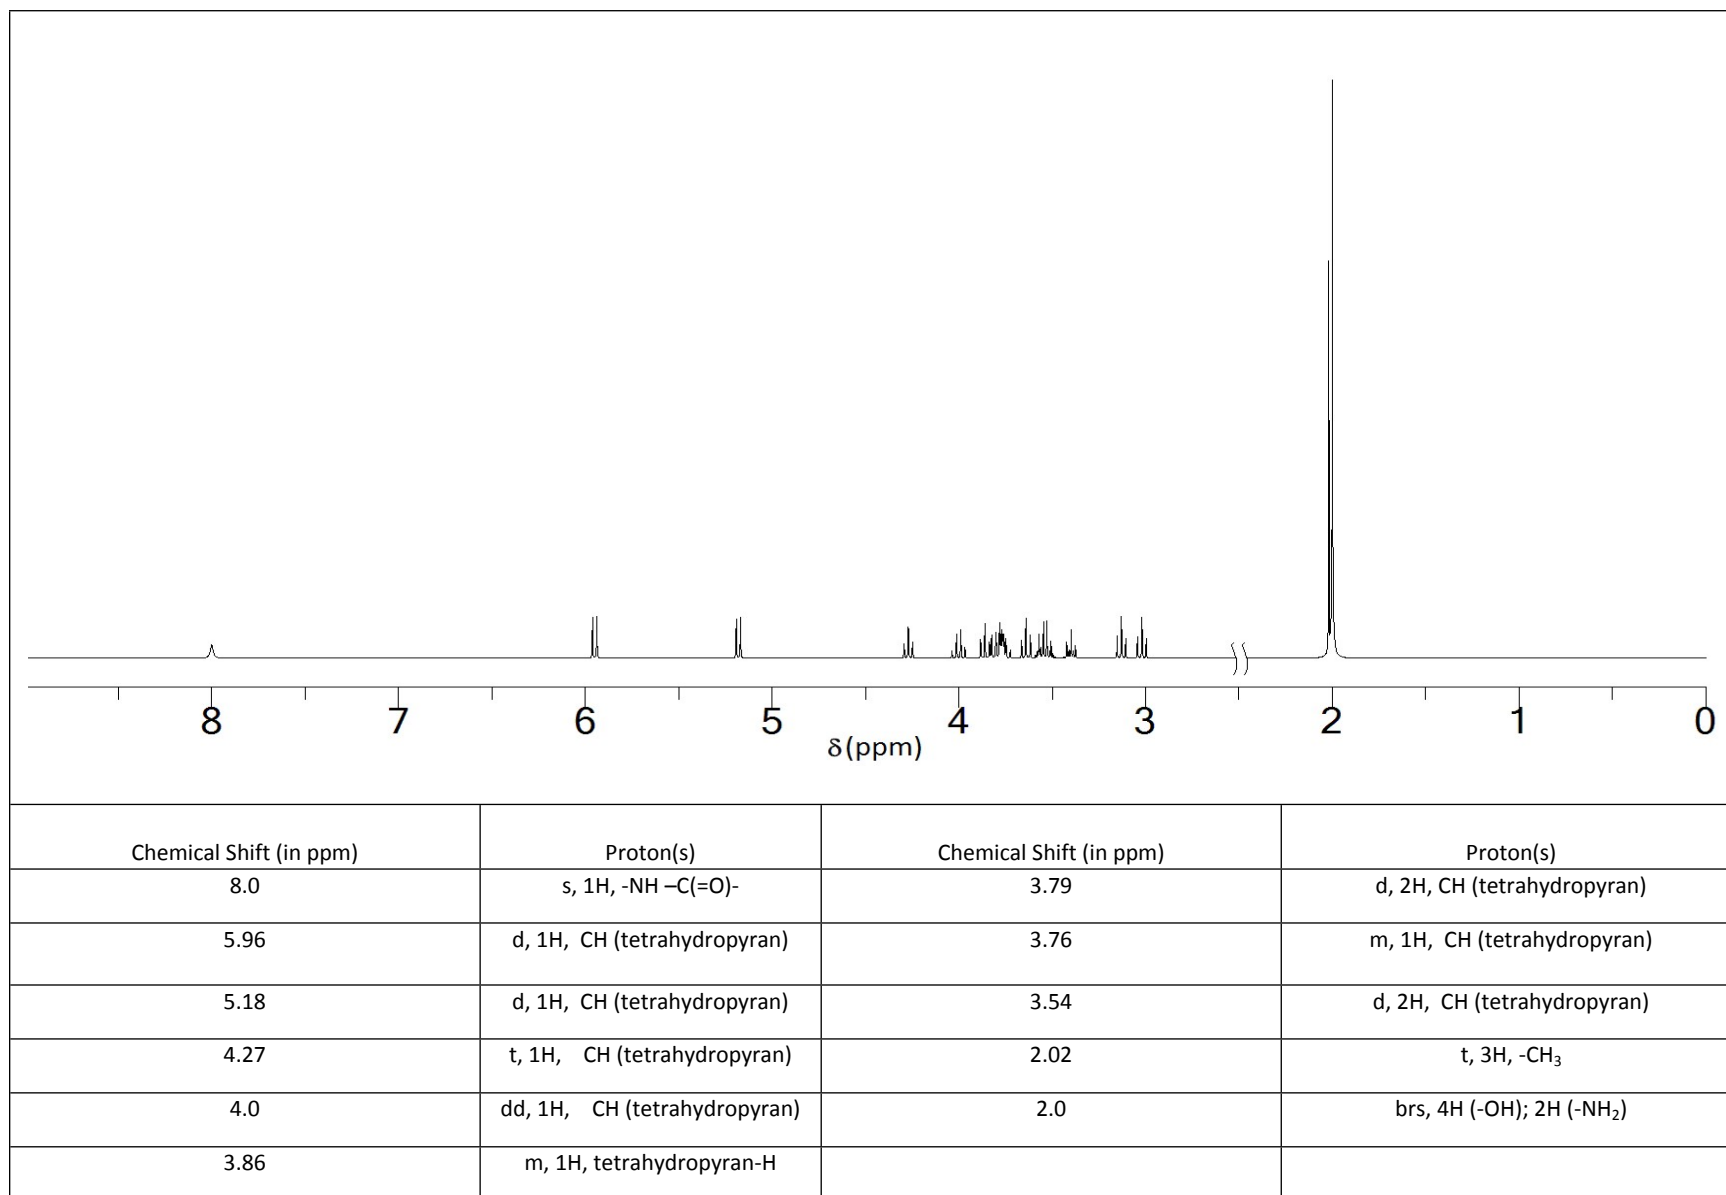

**Fig. S1(a)** <sup>1</sup>H-NMR spectra of SBC in DMSOD<sub>6</sub> at 298K with chemical shifts ( $\delta$ ) in ppm.

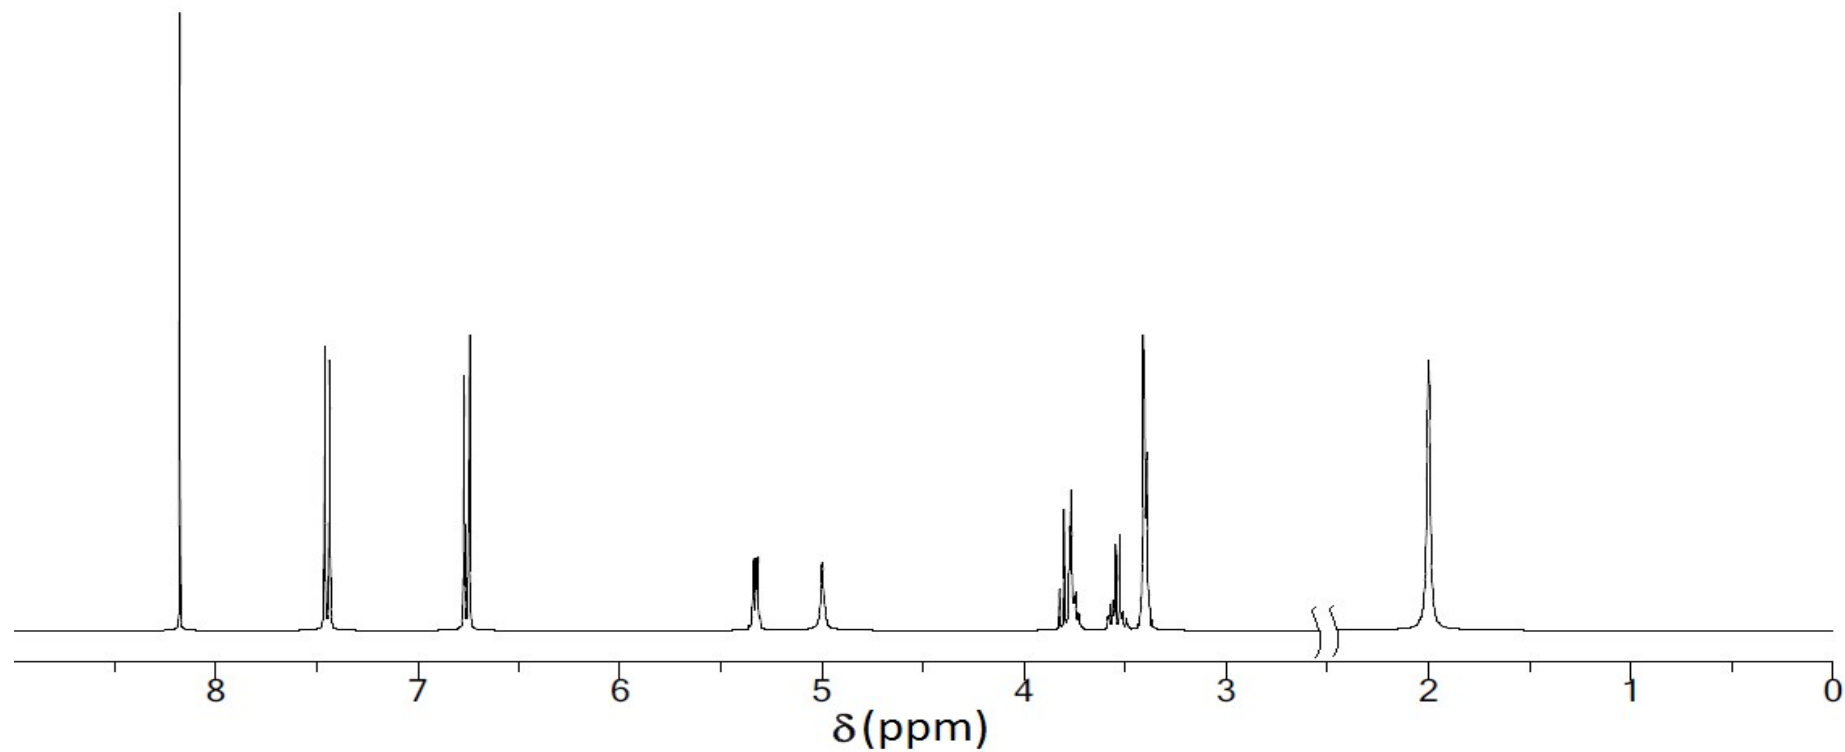

| Chemical Shift (in ppm) | Proton(s)          | Chemical Shift (in ppm) | Proton(s)                   |
|-------------------------|--------------------|-------------------------|-----------------------------|
| 8.18                    | s, 1H, CH=N        | 3.4                     | m, 3H, CH (tetrahydropyran) |
| 7.45                    | d, 2H, Ar-H        | 5.3                     | d, 1H, CH (tetrahydropyran) |
| 6.76                    | d, 2H, Ar-H        | 3.76                    | m, 1H, CH (tetrahydropyran) |
| 5.0                     | broad s, 1H, Ar-OH | 3.54                    | d, 1H, CH (tetrahydropyran) |
| 2.0                     | broad s, 2H, -OH   | 3.79                    | d, 1H, CH (tetrahydropyran) |

**Fig. S1 (b)**  $^1\text{H-NMR}$  spectra of SBC in  $\text{DMSOD}_6$  at 298K with chemical shifts ( $\delta$ ) in ppm.

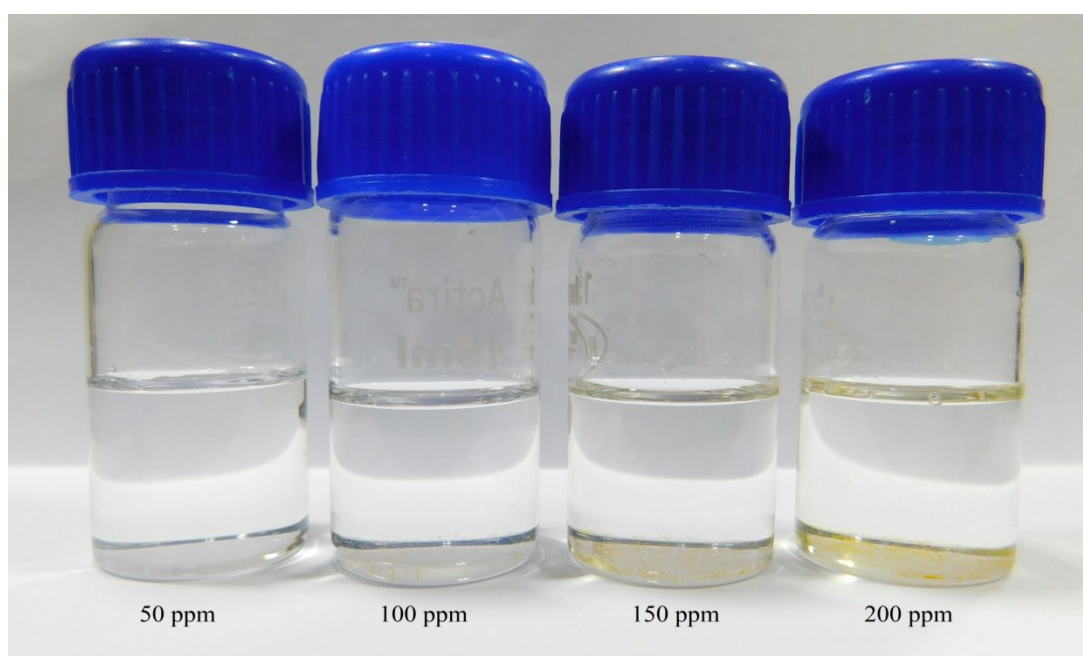

**Fig. S2** Solubility of SBC indifferent concentration viz 50ppm, 100ppm, 150ppm and 200ppm.

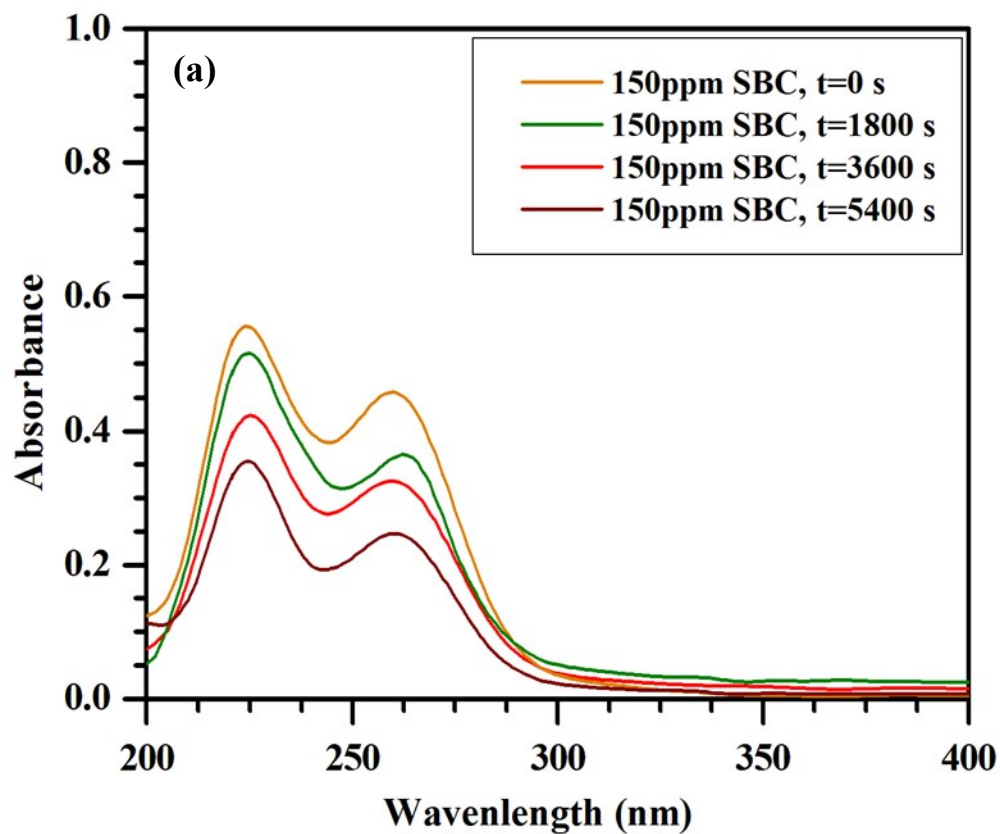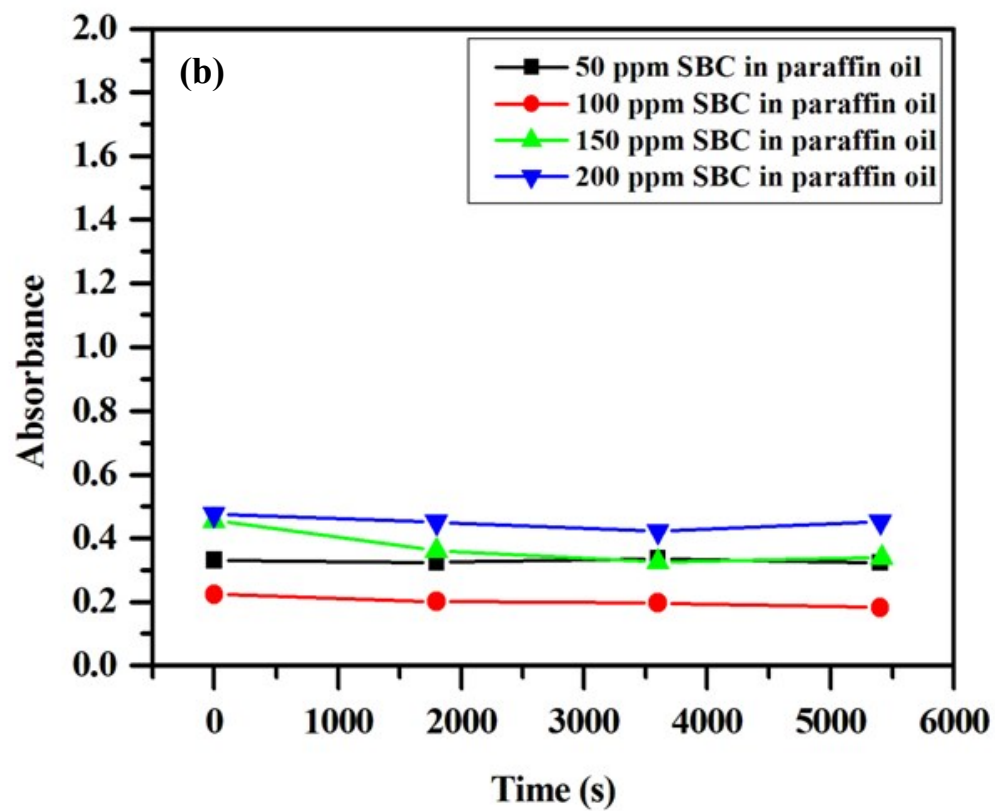

Fig. S3 Uv-Vis spectra of (a) 150 ppm of SBC in paraffin oil and (b) different concentration of SBC in paraffin oil with respect to time.

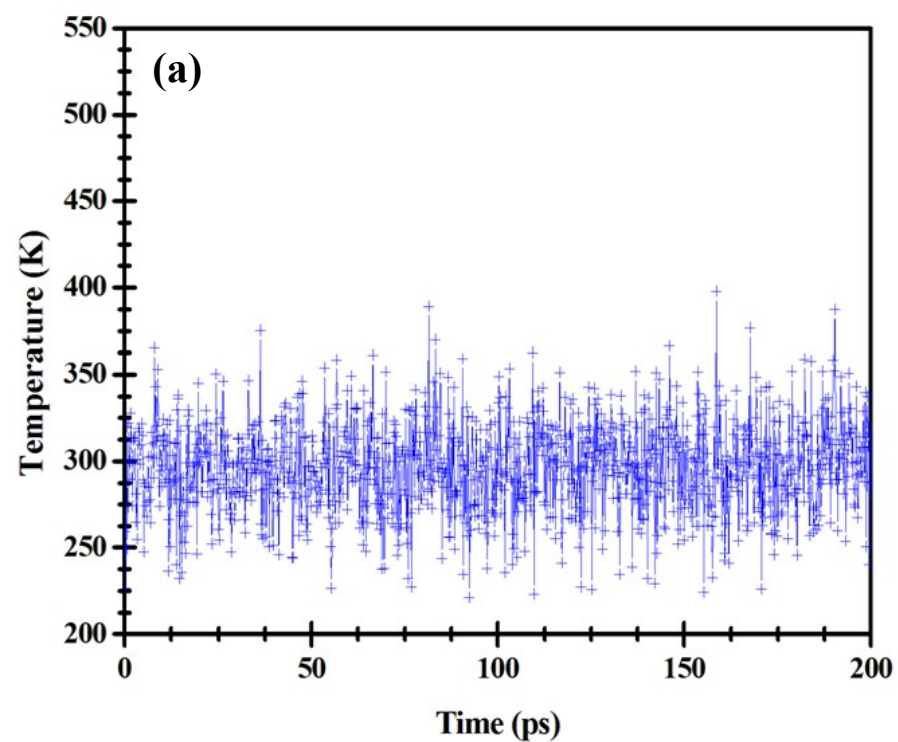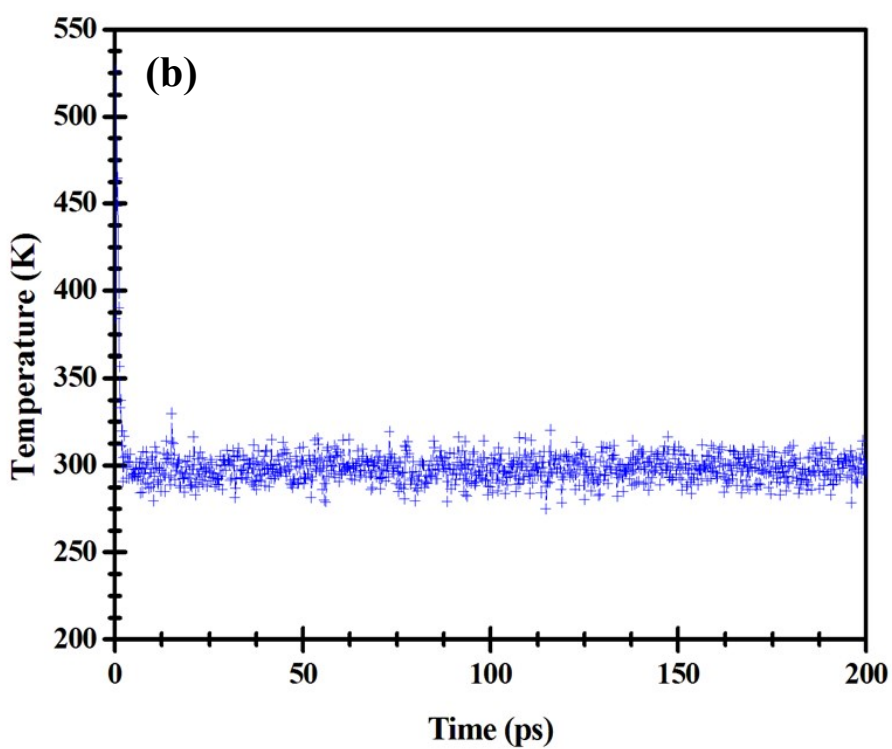

**Fig. S4** Temperature equilibrium curve obtained from molecular dynamics simulation of SBC on Fe (110) surface having (a) fixed atom surface and (b) relaxed atom surface.

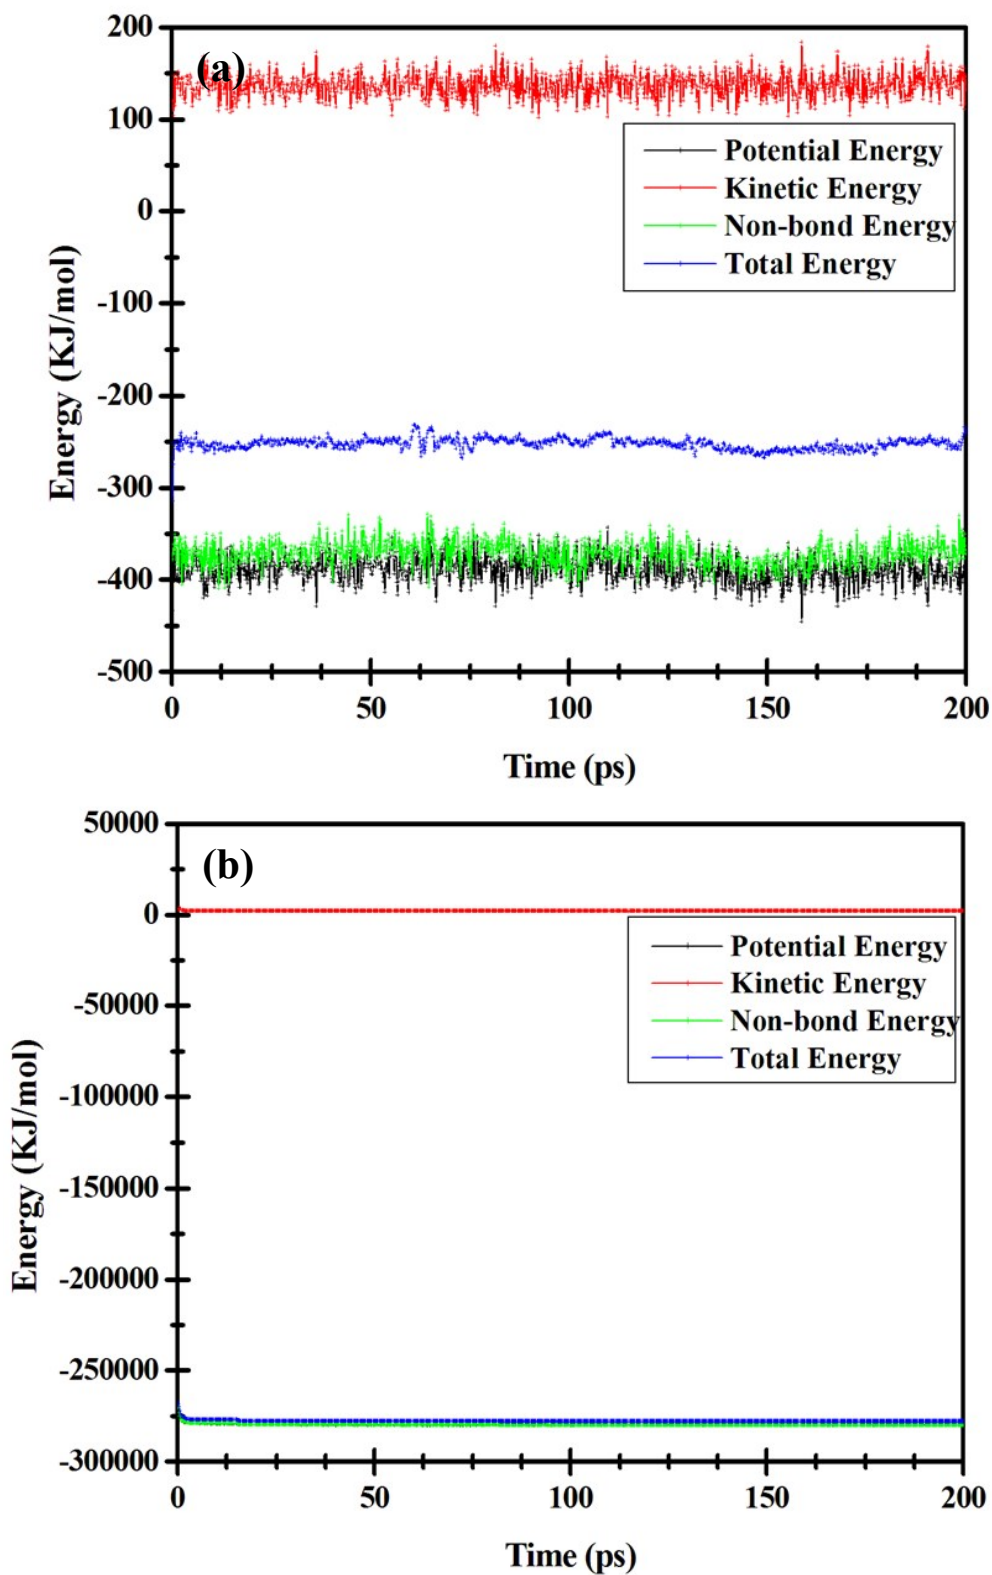

Fig. S5 Energy equilibrium curve obtained from molecular dynamics simulation of SBC on Fe (110) surface having (a) fixed atom surface and (b) relaxed atom surface.



**Table S1**Geometrical parameters *viz* bond lengths (Å) , bond angles (°) and torsion angle (°) of the optimized forms of SBC.

| Geometrical parameters of SBC |       |                 |        |                    |         |
|-------------------------------|-------|-----------------|--------|--------------------|---------|
| Bond length (Å)               |       | Bond angles (°) |        | Torsion angles (°) |         |
| C1-O2                         | 1.444 | C1-O2-C3        | 117.27 | C1-O2-C3-C4        | 55.76   |
| O2-C3                         | 1.407 | O2-C3-C4        | 112.65 | O2-C3-C4-C5        | 55.49   |
| C3-C4                         | 1.544 | C3-C4-C5        | 109.26 | C3- C4-C5-C6       | 52.96   |
| C4-C5                         | 1.550 | C4-C5-C6        | 110.16 | C4-C5-C6-C1        | -50.44  |
| C5-C6                         | 1.553 | C5-C6-C1        | 112.83 | C5-C6-C1-C2        | 47.25   |
| C6-C1                         | 1.540 | O2-C1-C9        | 112.46 | C6-C1-C9-O12       | 151.23  |
| C3-O7                         | 1.426 | C1-C9-O12       | 113.19 | C1-O2-C3-O7        | -64.98  |
| C5-O10                        | 1.424 | O2-C3-O7        | 111.93 | C3-C4-C5-O10       | -73.68  |
| C6-O8                         | 1.425 | C1-C6-O8        | 110.64 | O2-C3-C4-N11       | 64.37   |
| C1-C9                         | 1.553 | C3-C4-N11       | 109.27 | C4-N11-C13-C14     | 179.89  |
| C9-O12                        | 1.431 | C4-N11-C13      | 118.71 | N11-C13-C14-C15    | -177.99 |
| C4-N11                        | 1.455 | N11- C13-C14    | 124.41 | C13-C14-C15-C16    | 179.75  |
| N11-C13                       | 1.276 | C13-C14-C15     | 119.17 | C14-C15-C16-C19    | 0.06    |
| C13-C14                       | 1.467 | C14-C15-C16     | 121.35 | C14-C17-C18-C19    | -0.06   |
| C14-C15                       | 1.408 | C15-C16-C19     | 119.49 | C17-C18-C19-C16    | -0.09   |
| C15-C16                       | 1.392 | C16-C19-C18     | 120.01 | C17-C18-C19-O20    | 179.99  |
| C16-C19                       | 1.406 | C19-C18-C17     | 119.97 | –                  | –       |
| C14-C17                       | 1.408 | C18-C17-C14     | 120.83 | –                  | –       |
| C17-C18                       | 1.391 | C17-C14-C15     | 180.36 | –                  | –       |
| C18-C19                       | 1.406 | –               | –      | –                  | –       |
| C19-O20                       | 1.364 | –               | –      | –                  | –       |

## References

- S1. I. Lukovits, E. Kalman and F. Zucchi, *Corrosion*, 2001, **57**, 3-8.
- S2. H. Sun, *J. Phys. Chem. B* 1998, **102**, 7338–7364.
- S3. H. Sun, P. Ren and J. R. Fried, *Comput. Theor. Polym. Sci.*, 1998, **8**, 229–246.
- S4. S. W. Bunte and H. Sun, *J. Phys. Chem. B* 2000, **104**, 2477–2489.
- S5. A. Dutta, S. K. Saha, P. Banerjee, A. K. Patra and D. Sukul, *RSC Adv.*, 2016, **6**, 74833.
